# Supplementary material
Source: ML conference proceedings conference paper supplement (https://openreview.net/forum?id=HN2xWpMQ30K)
Supplement: supplementary_material [file attachment]

# Supplementary Materials

## 1 A CISI Standard Experiment Results

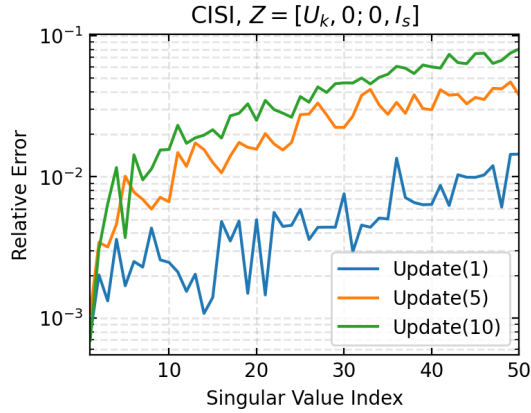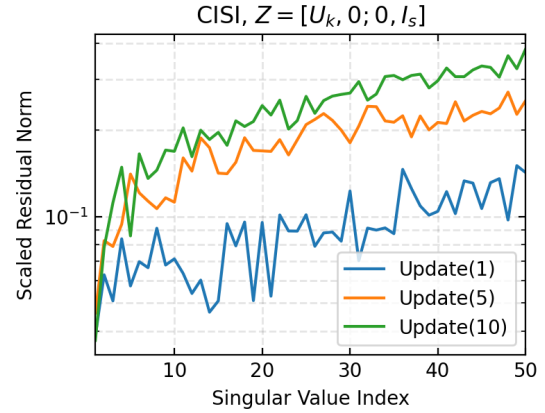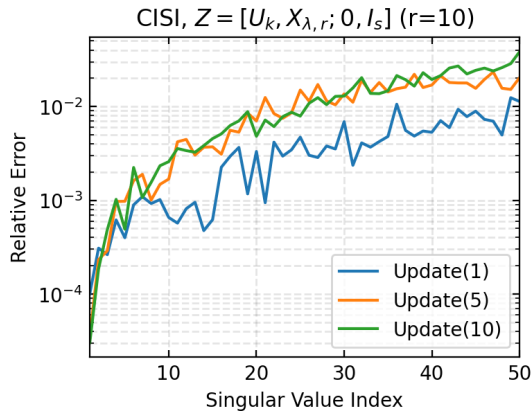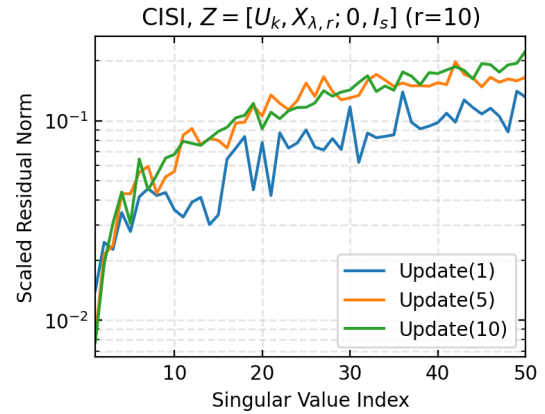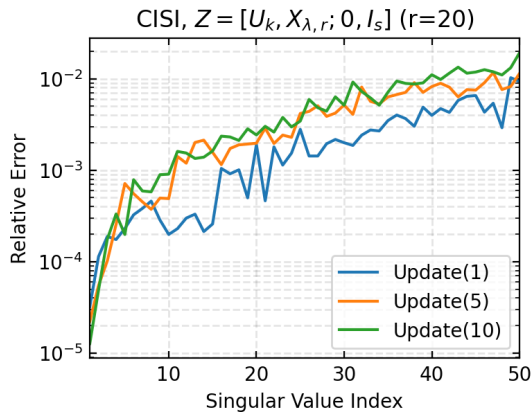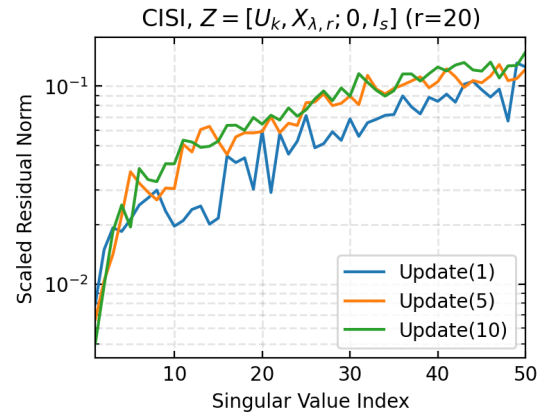

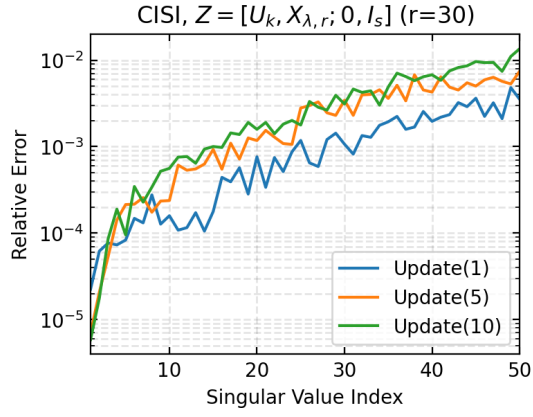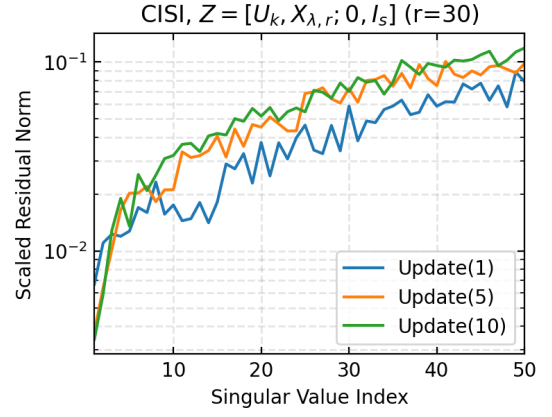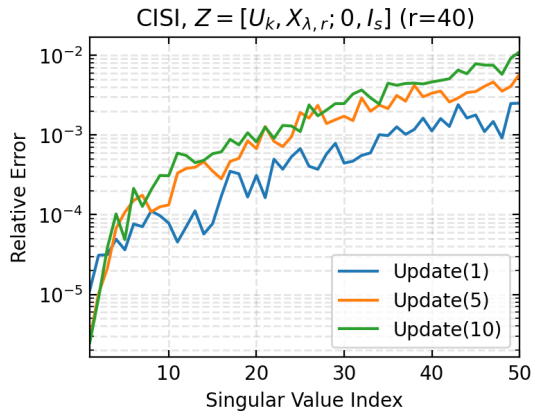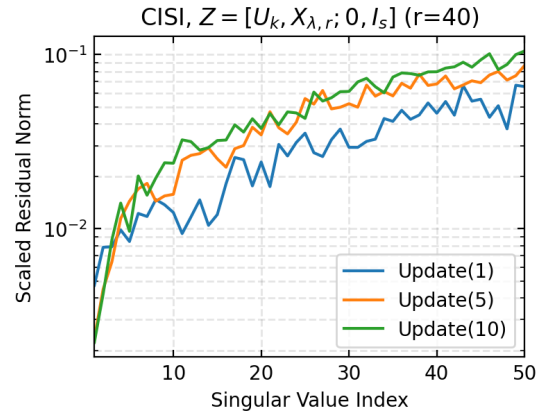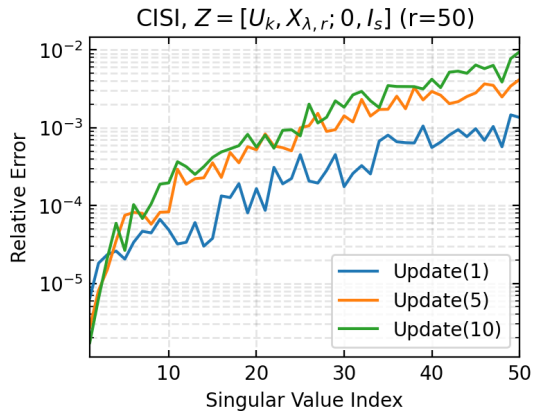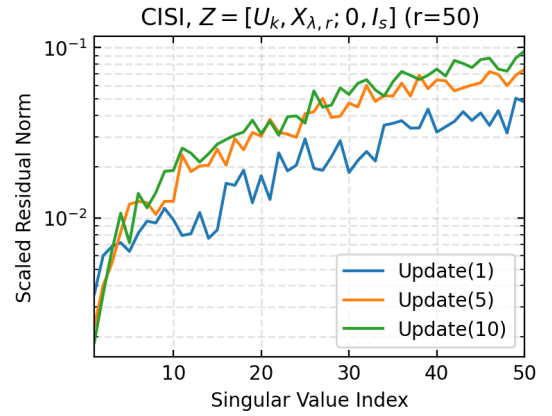

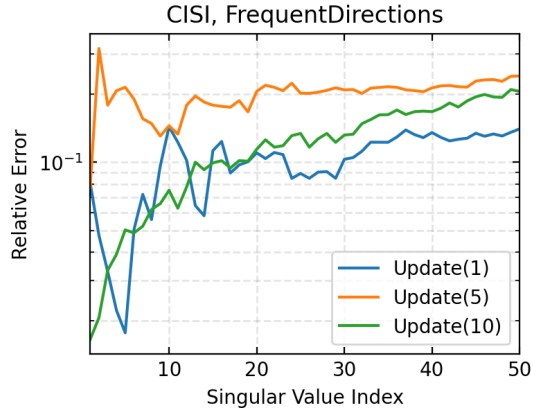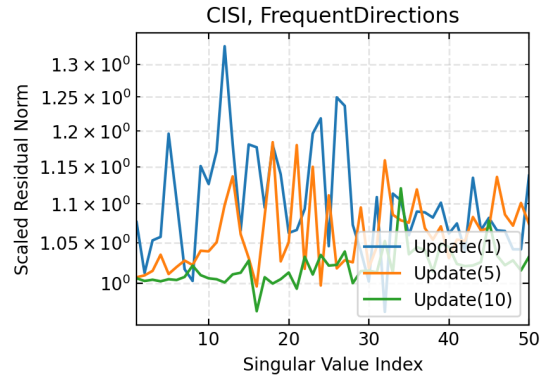

Figure 1: Relative errors and residual norms of leading  $k = 50$  singular triplets for CISI at updates  $\phi = 1, 5, 10$  using Algorithm 2.1, Algorithm 2.2 ( $r = 10, 20, 30, 40, 50$ ), and FrequentDirections.

## 2 B CRAN Standard Experiment Results

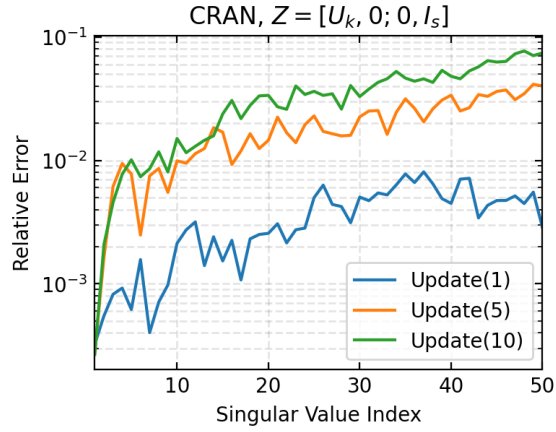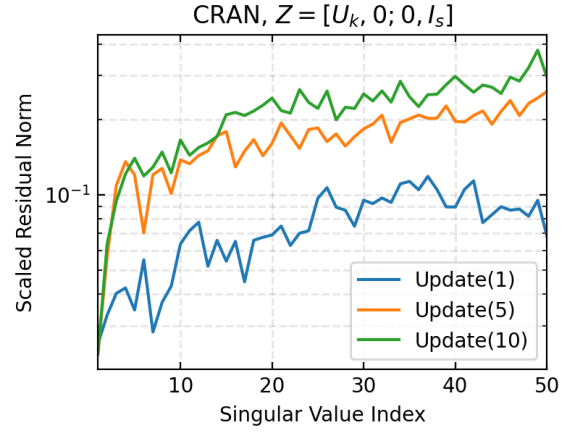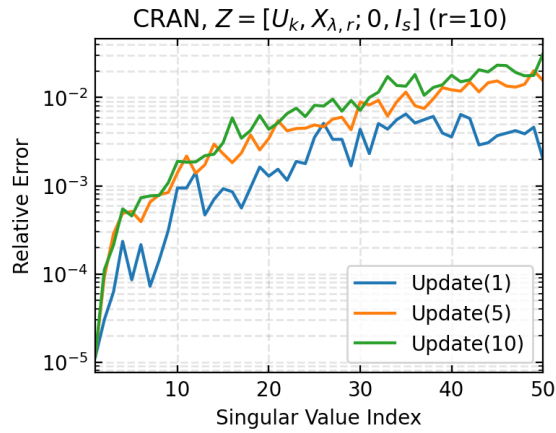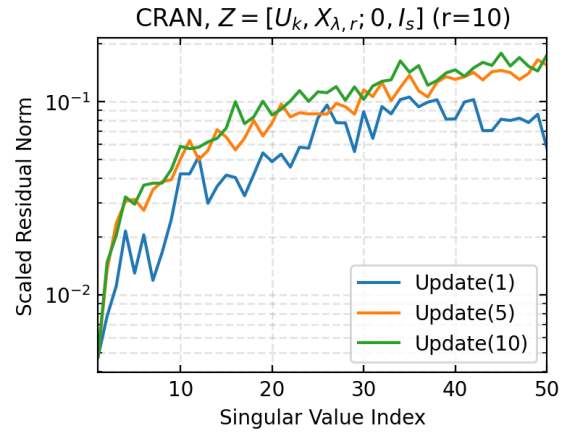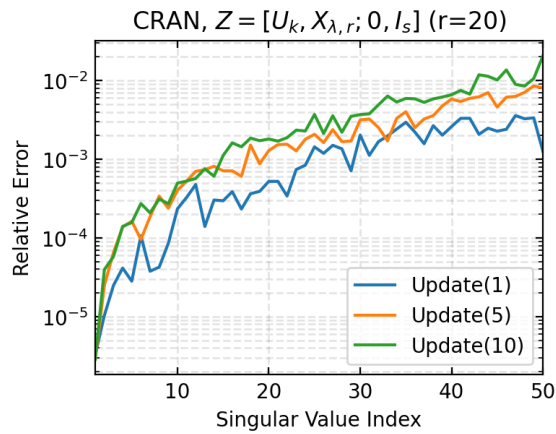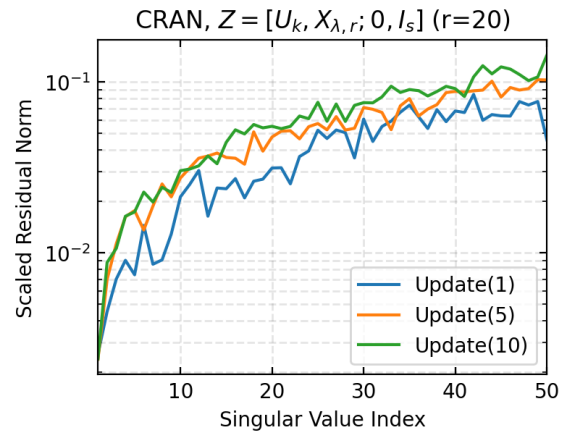

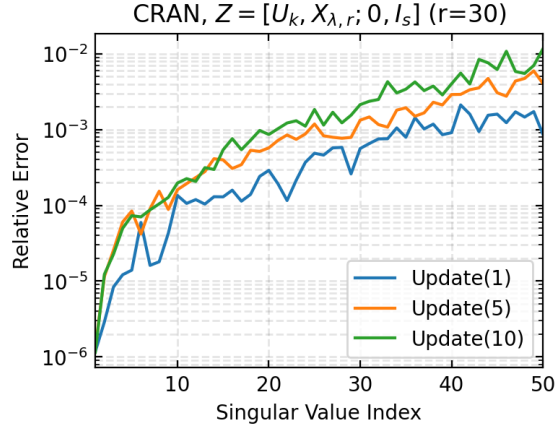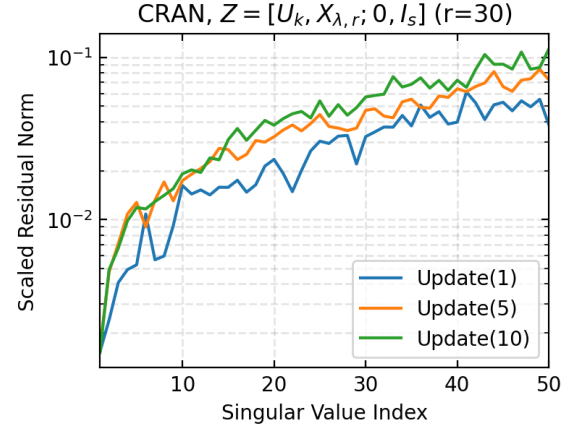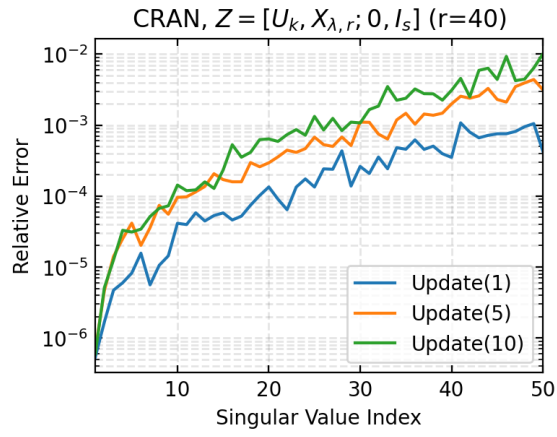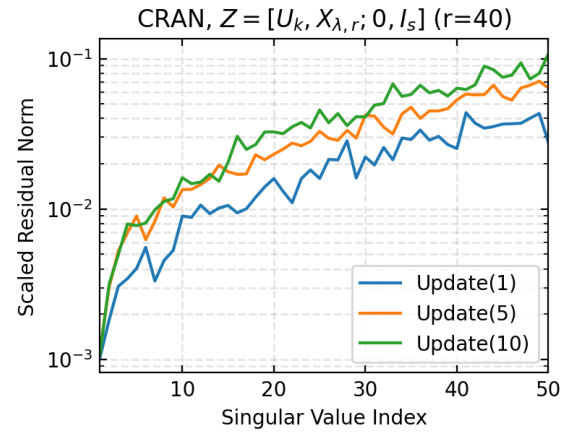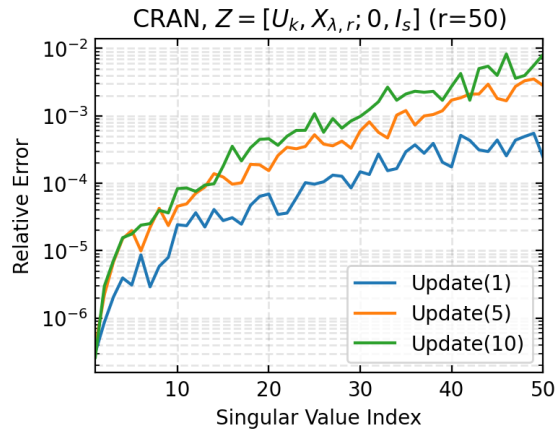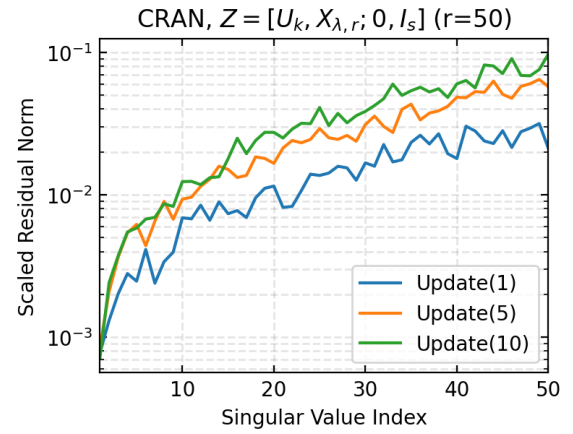

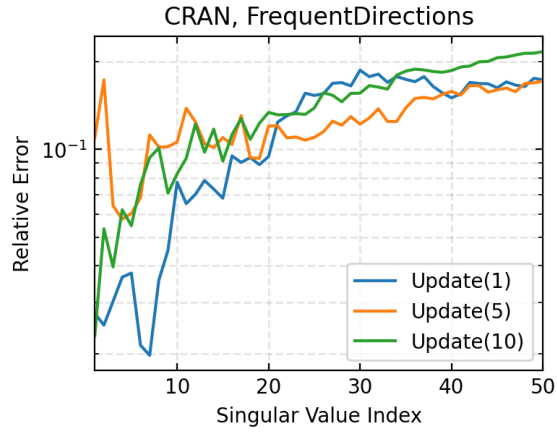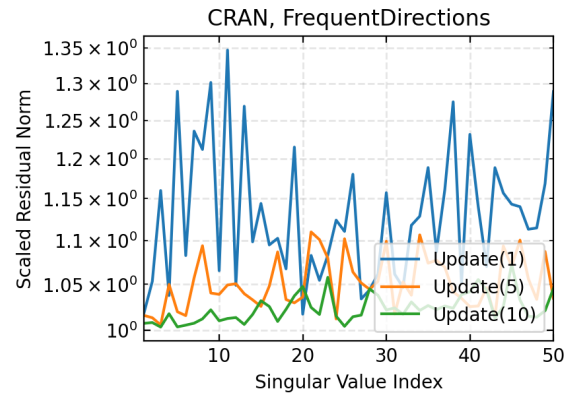

Figure 2: Relative errors and residual norms of leading  $k = 50$  singular triplets for CRAN at updates  $\phi = 1, 5, 10$  using Algorithm 2.1, Algorithm 2.2 ( $r = 10, 20, 30, 40, 50$ ), and FrequentDirections.

### 3 C MED Standard Experiment Results

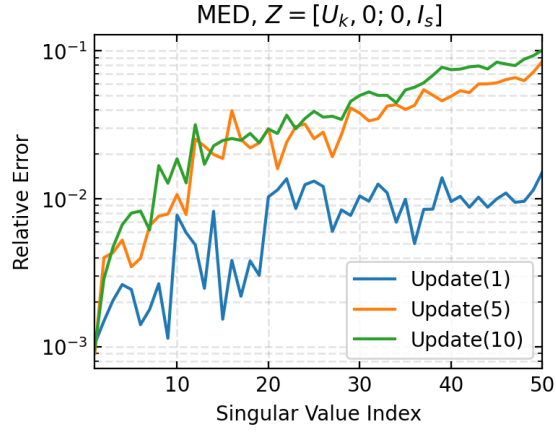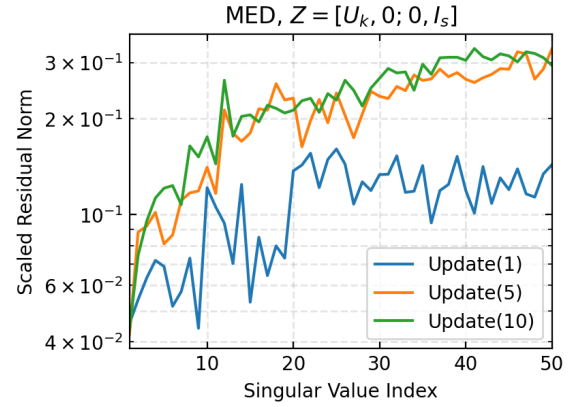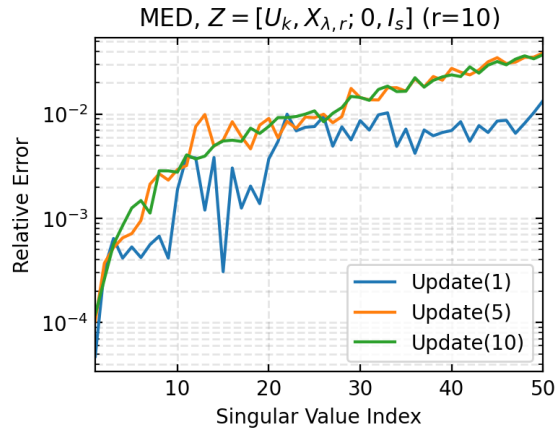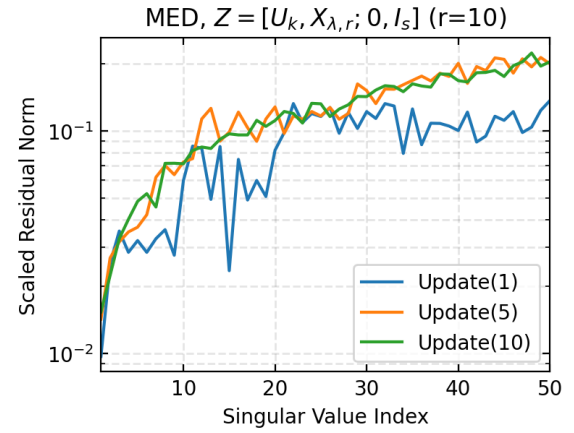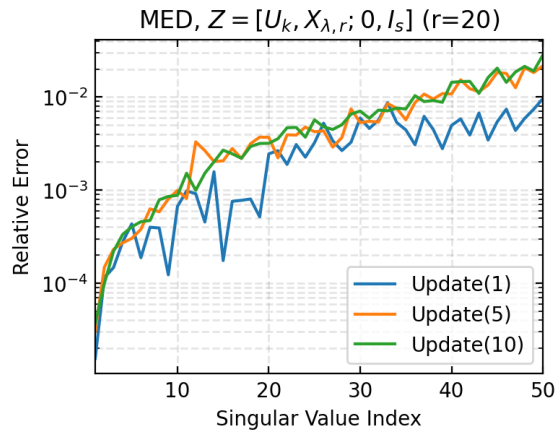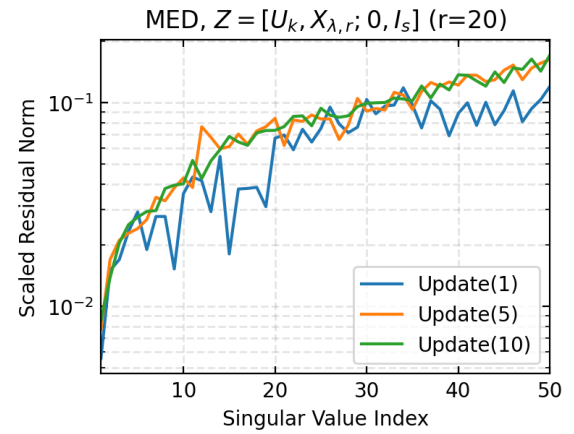

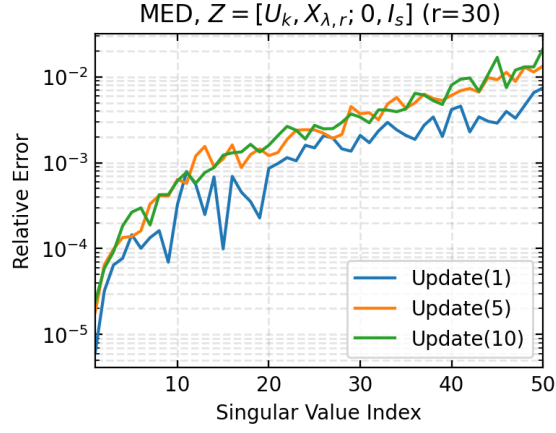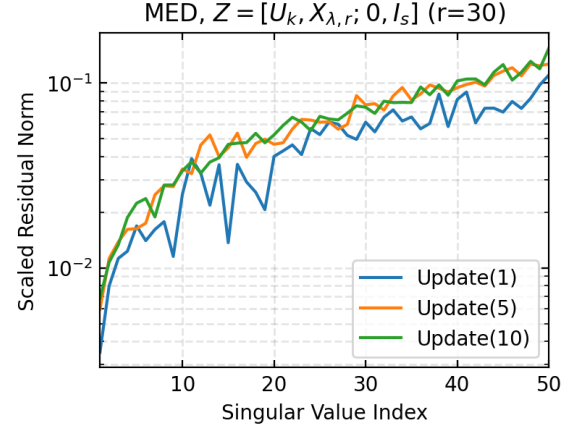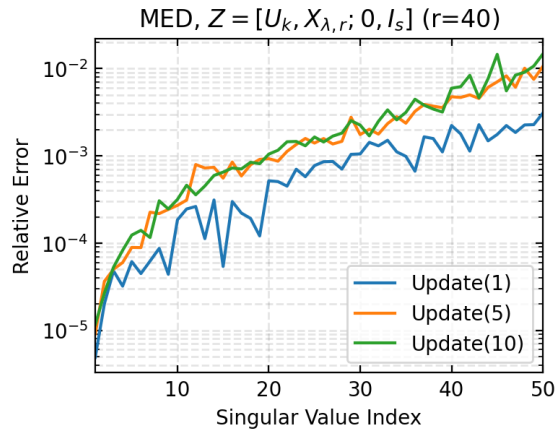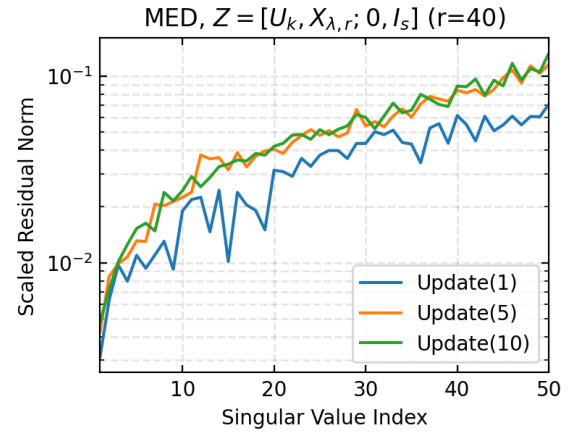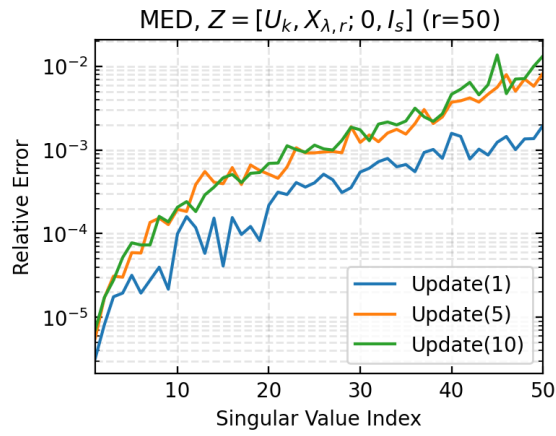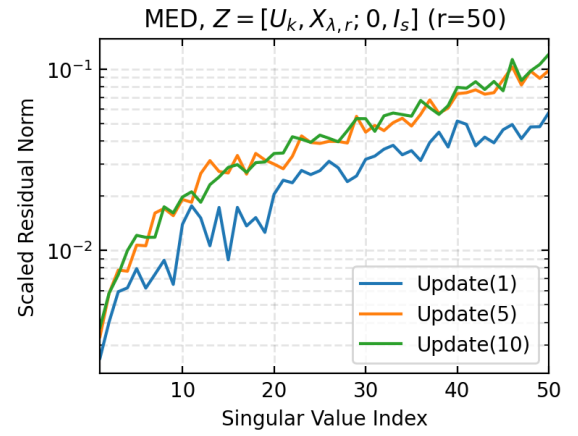



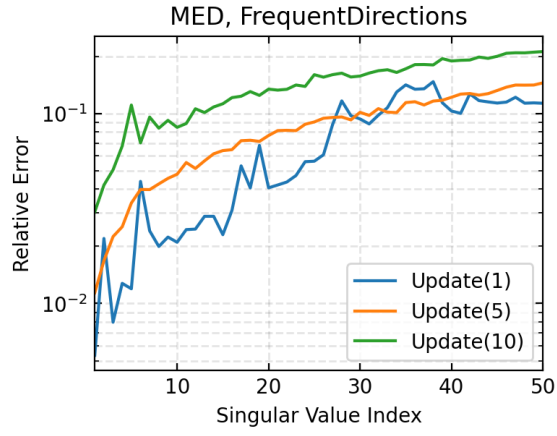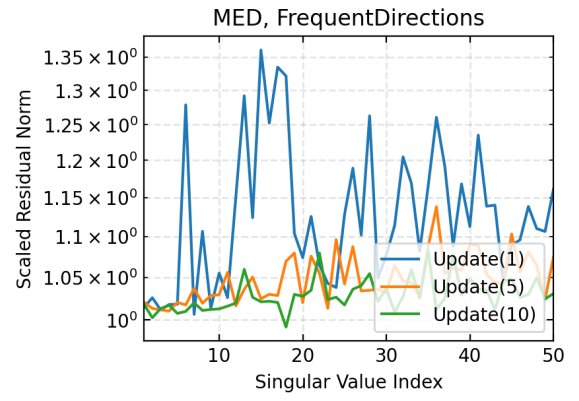

Figure 3: Relative errors and residual norms of leading  $k = 50$  singular triplets for MED at updates  $\phi = 1, 5, 10$  using Algorithm 2.1, Algorithm 2.2 ( $r = 10, 20, 30, 40, 50$ ), and FrequentDirections.

## 4 D ML1M Standard Experiment Results

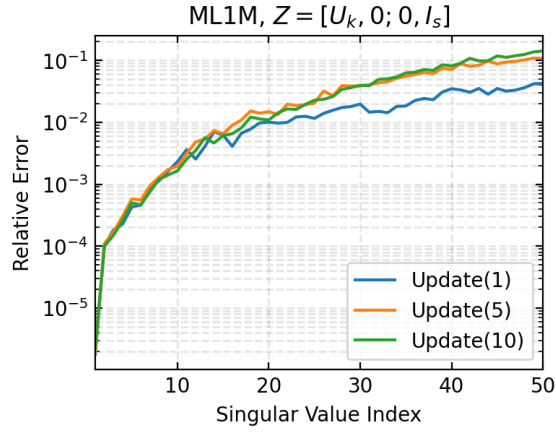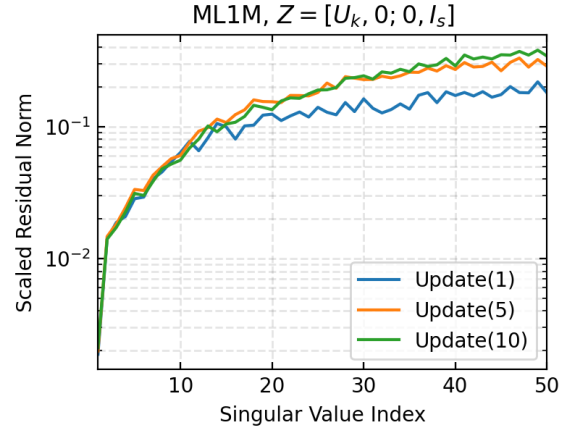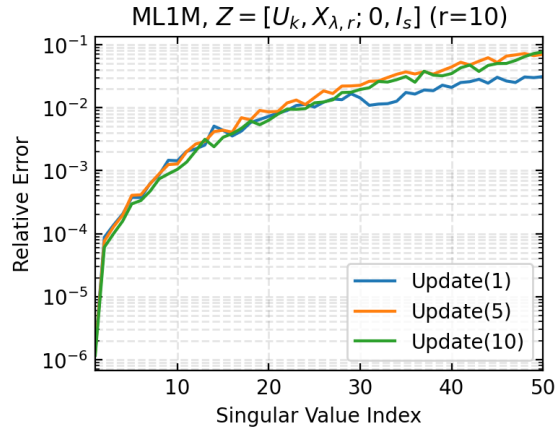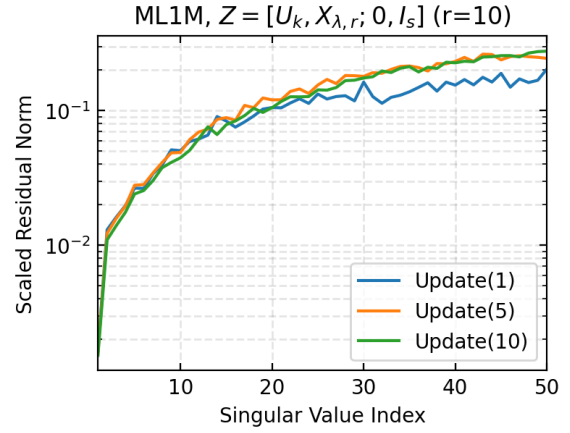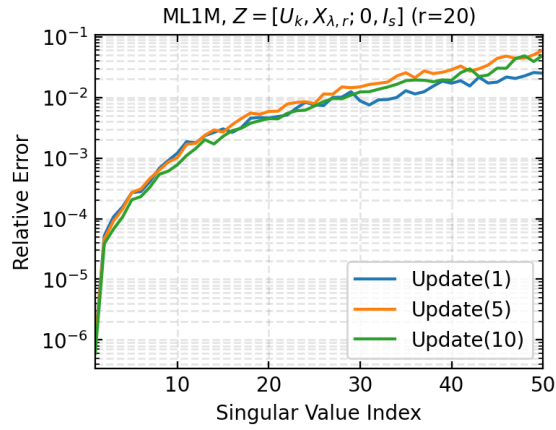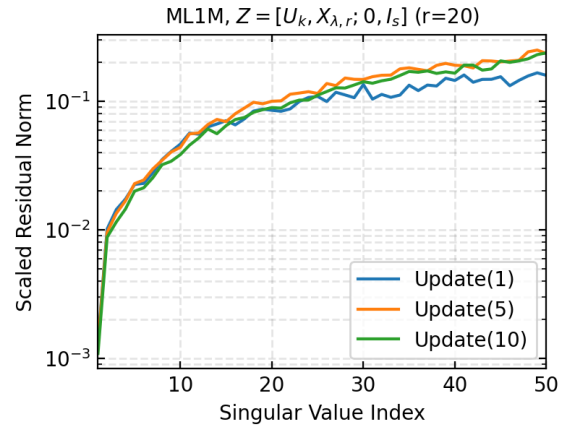

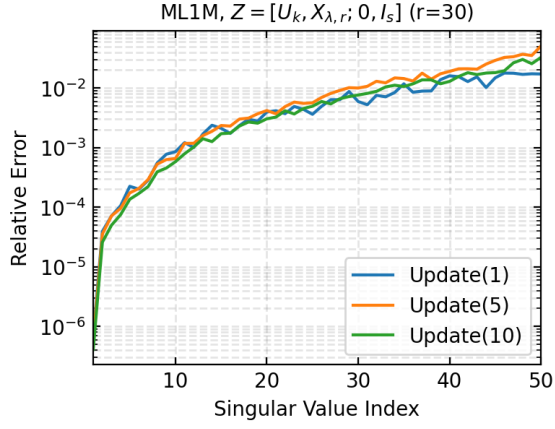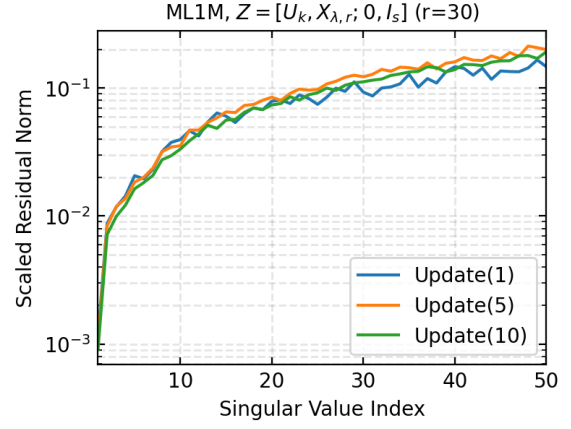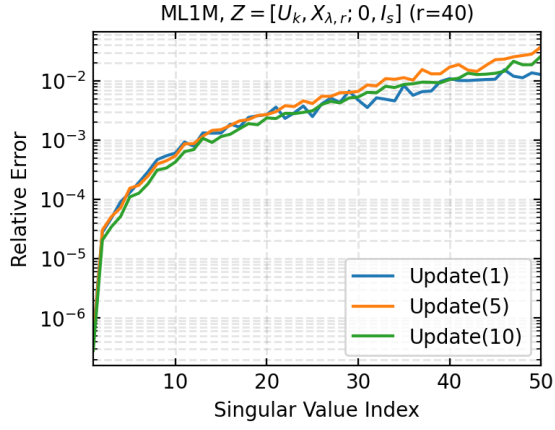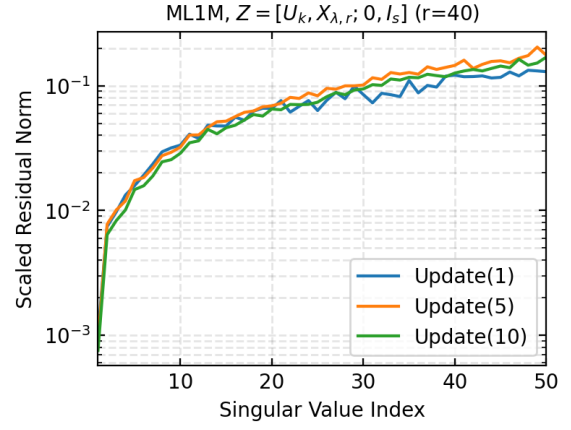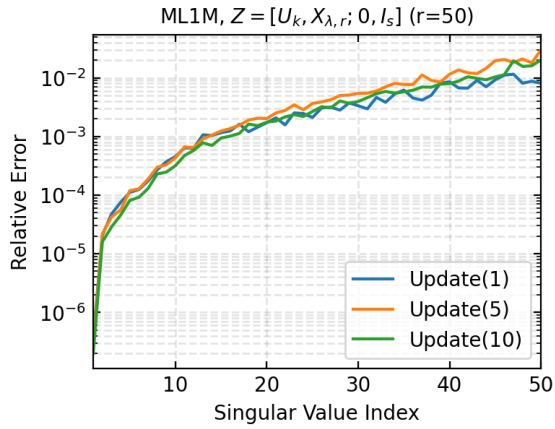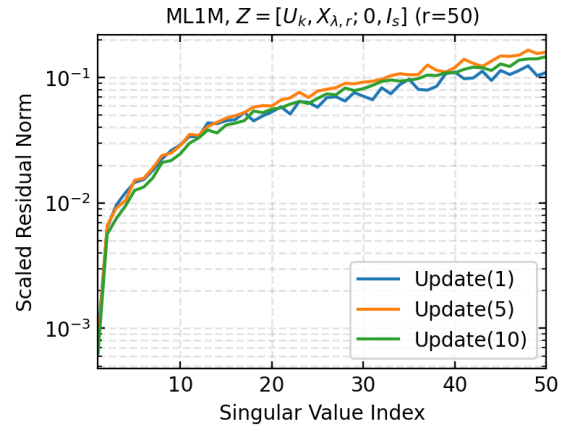

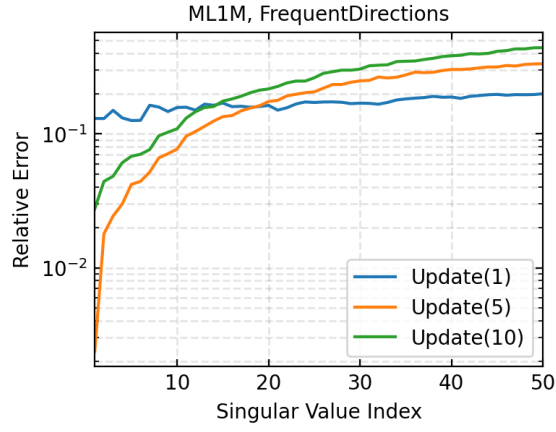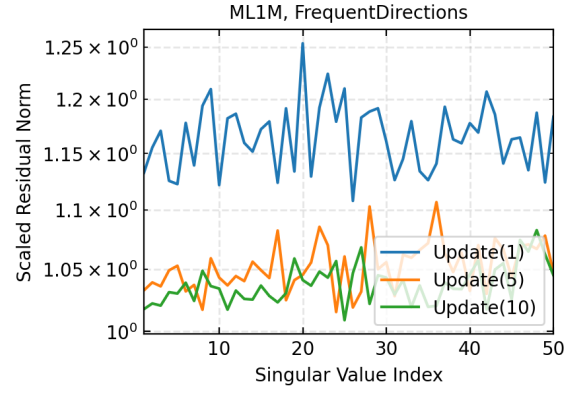

Figure 4: Relative errors and residual norms of leading  $k = 50$  singular triplets for ML1M at updates  $\phi = 1, 5, 10$  using Algorithm 2.1, Algorithm 2.2 ( $r = 10, 20, 30, 40, 50$ ), and FrequentDirections.

## 5 E Reuters-21578 Standard Experiment Results

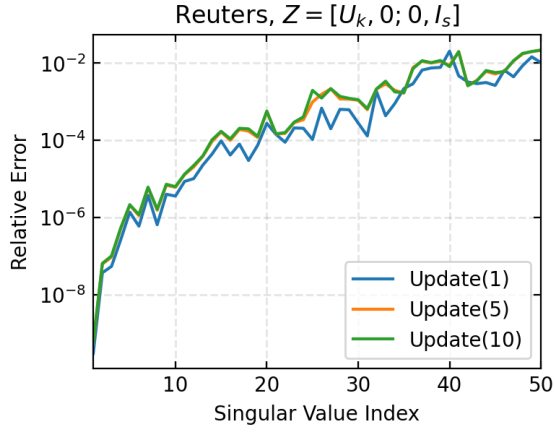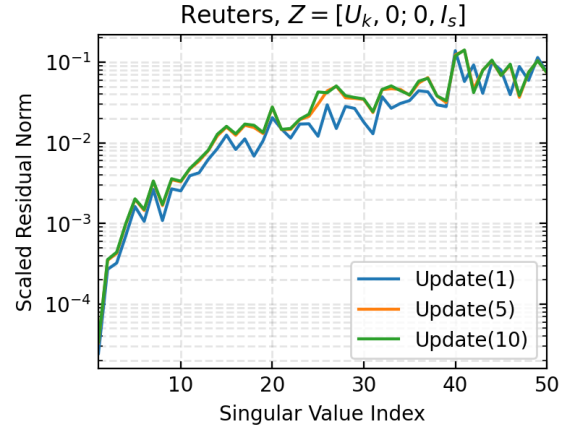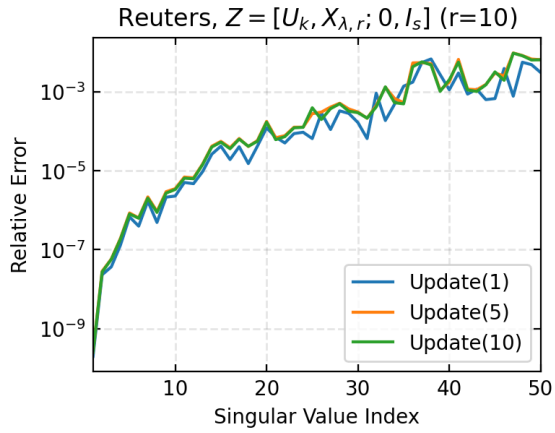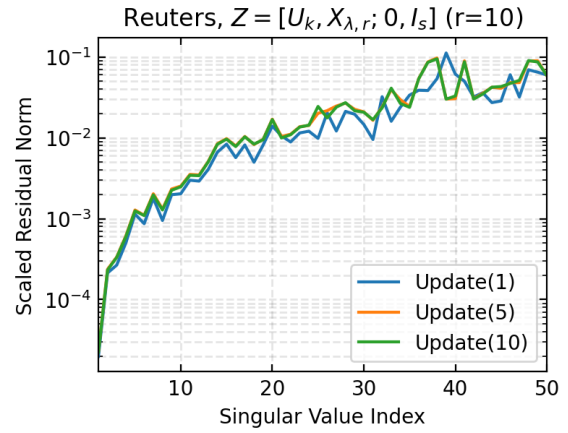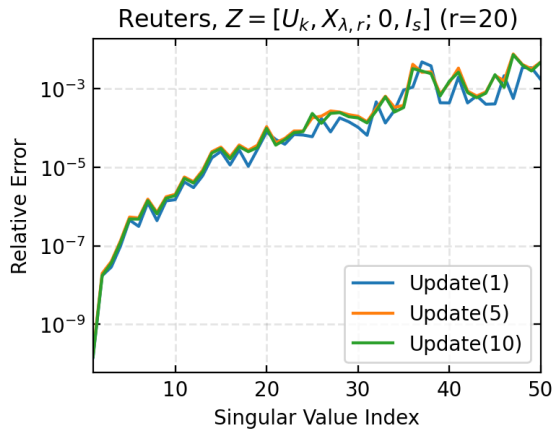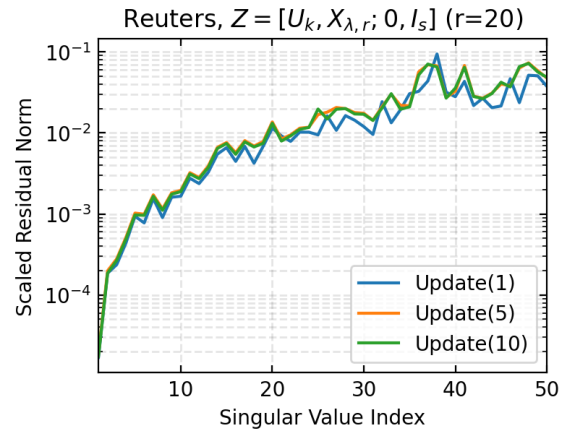

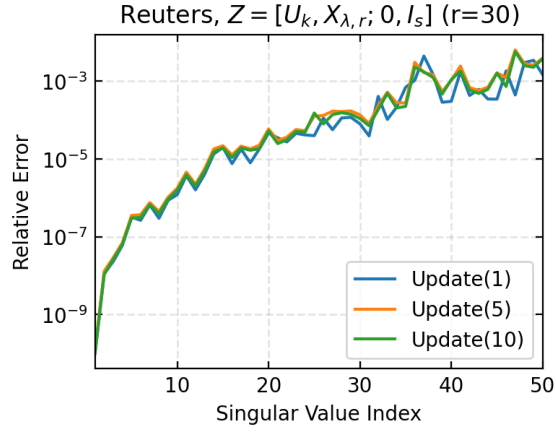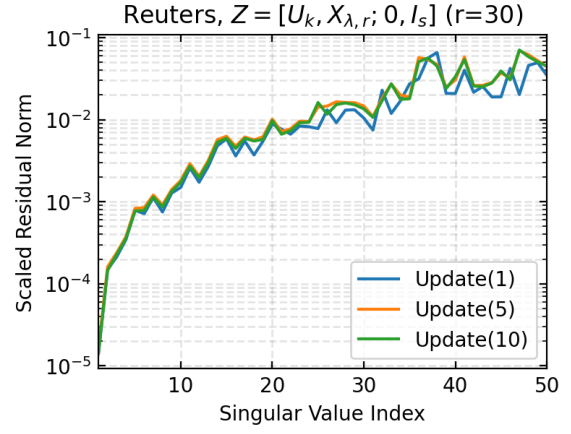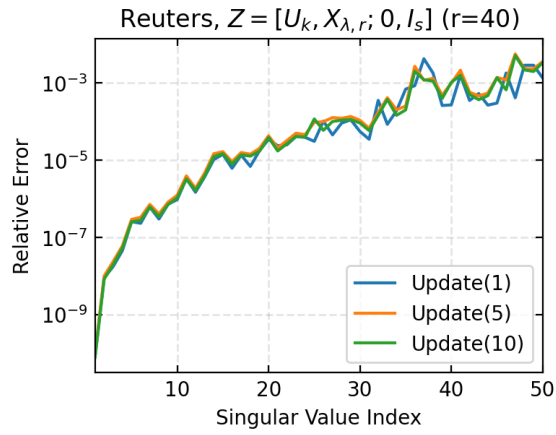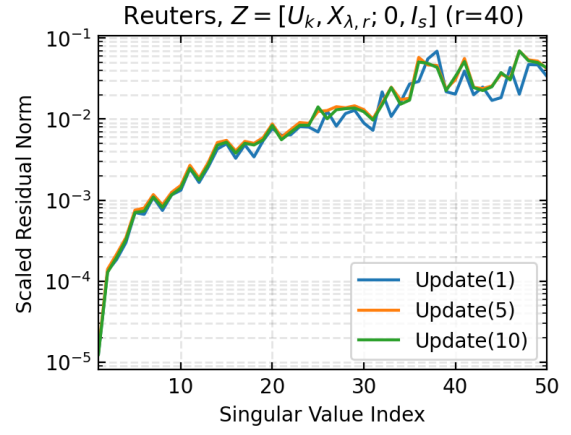

(a) Reuters residual norm (Algorithm 2.2)

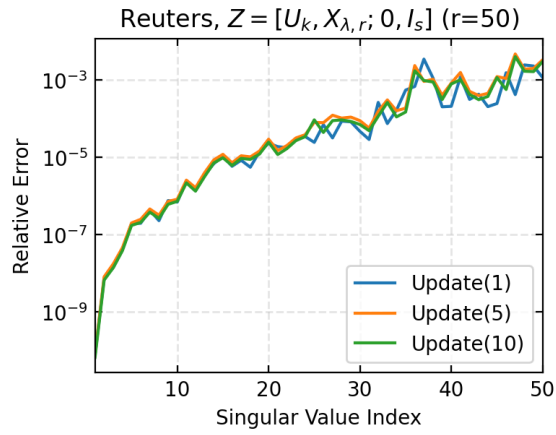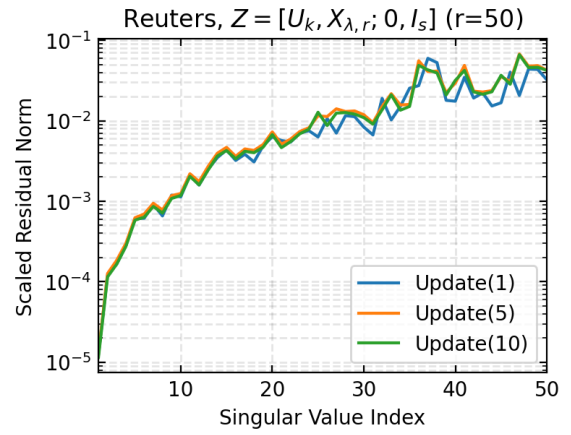

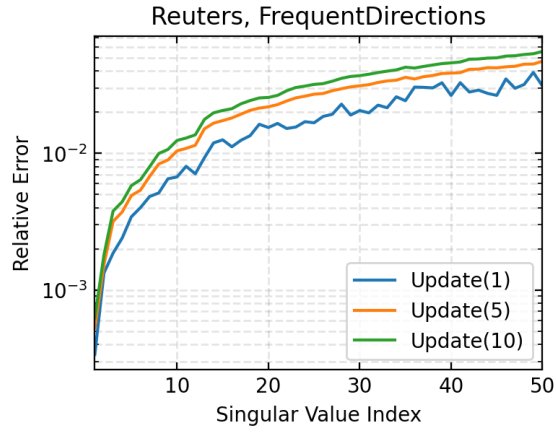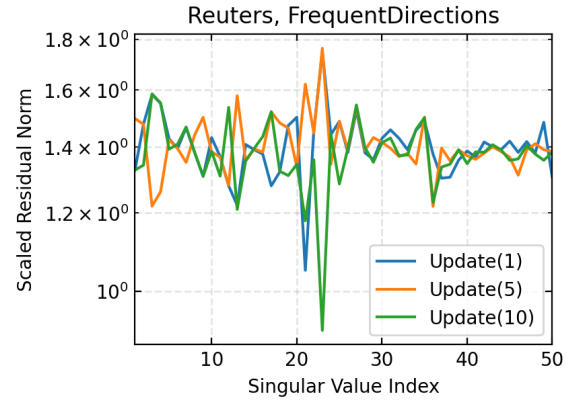

Figure 5: Relative errors and residual norms of leading  $k = 50$  singular triplets for Reuters-21578 at updates  $\phi = 1, 5, 10$  using Algorithm 2.1, Algorithm 2.2 ( $r = 10, 20, 30, 40, 50$ ), and FrequentDirections.

## 6 F Runtimes from Standard Experiments

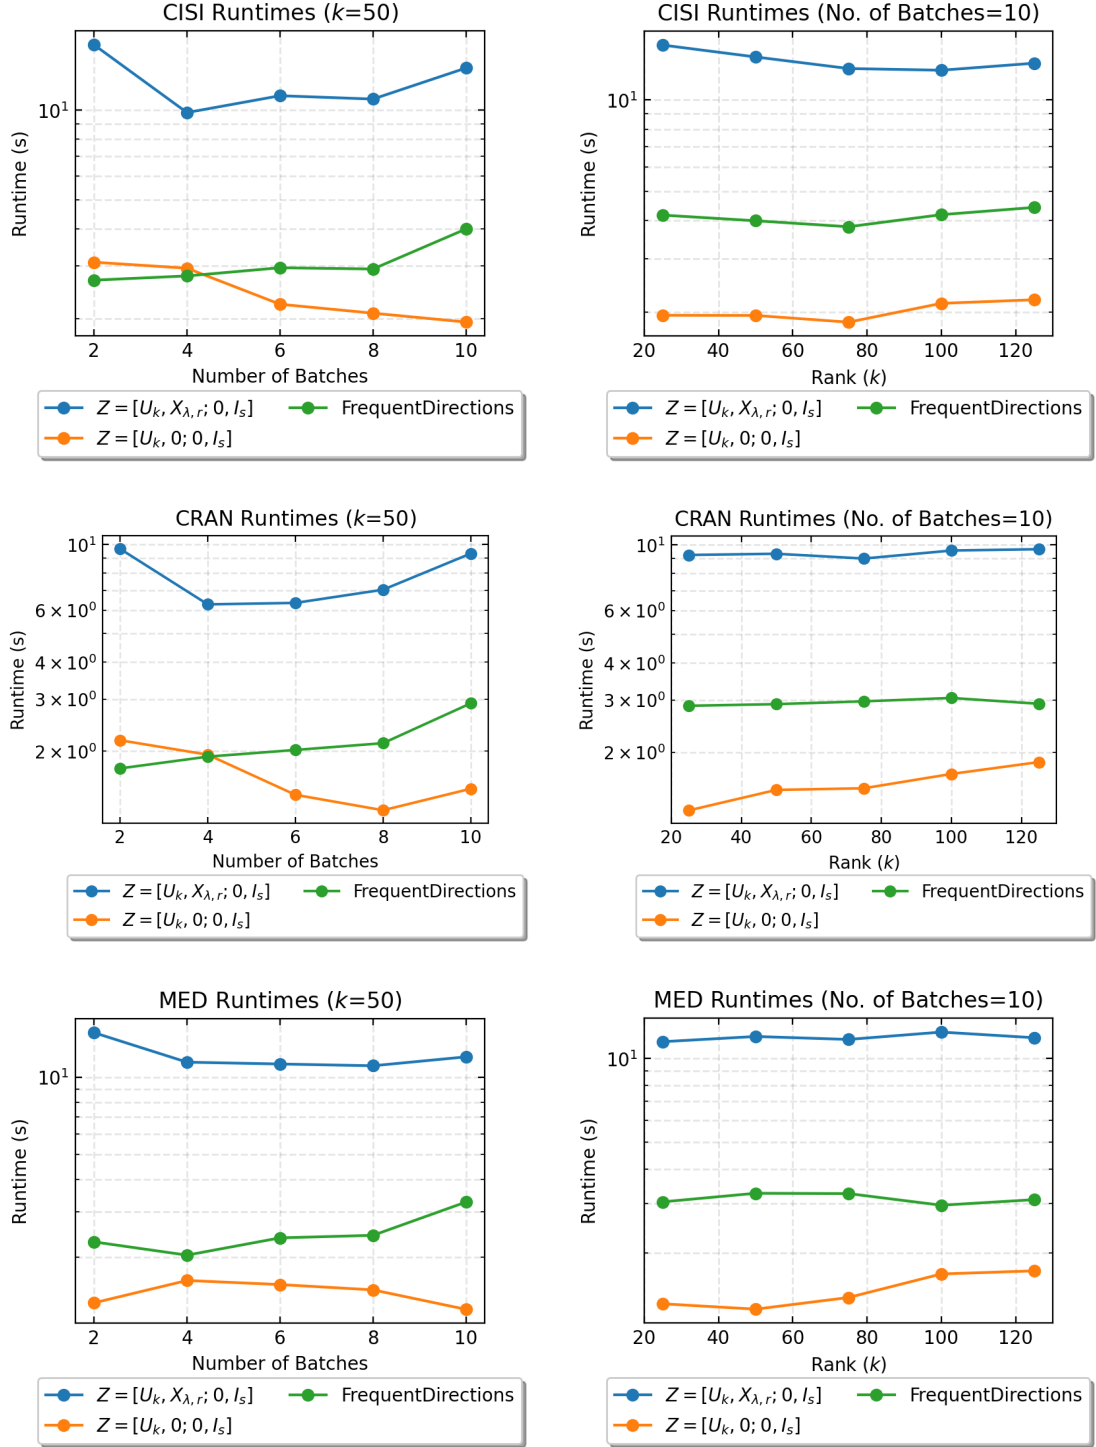

Figure 6: Runtimes on CISI, CRAN, and MED for all update methods.
